# Supplementary material for: Nanocellulose-Assisted Construction of Multifunctional MXene-Based Aerogels with Engineering Biomimetic Texture for Pressure Sensor and Compressible Electrode
Source: PubMed Central journal article supplement (PMC10086089; doi:10.1007/s40820-023-01073-x), 2023-04-10
Supplement: 40820_2023_1073_MOESM1_ESM.pdf [file 40820_2023_1073_MOESM1_ESM.pdf]

Supporting Information for

## Nanocellulose-Assisted Construction of Multifunctional MXene-Based Aerogels with Engineering Biomimetic Texture for Pressure Sensor and Compressible Electrode

Ting Xu<sup>1,†</sup>, Qun Song<sup>2,†</sup>, Kun Liu<sup>1,†</sup>, Huayu Liu<sup>1,†</sup>, Junjie Pan<sup>2</sup>, Wei Liu<sup>1,2</sup>, Lin Dai<sup>1</sup>, Meng Zhang<sup>1</sup>, Yaxuan Wang<sup>1</sup>, Chuanling Si<sup>1,4,\*</sup>, Haishun Du<sup>3,\*</sup>, and Kai Zhang<sup>2,\*</sup>

<sup>1</sup>State Key Laboratory of Biobased Fiber Manufacturing Technology, Tianjin Key Laboratory of Pulp and Paper, Tianjin University of Science and Technology, Tianjin 300457, P. R. China

<sup>2</sup>Sustainable Materials and Chemistry, Department of Wood Technology and Wood-based Composites, University of Göttingen, Göttingen D-37077, Germany

<sup>3</sup>Department of Chemical Engineering, Auburn University, Auburn AL-36849, USA

<sup>4</sup>State Key Laboratory of Bio-based Materials and Green Papermaking, Qilu University of Technology (Shandong Academy of Sciences), 3501 Daxue Road, Jinan 250353, P. R. China

<sup>†</sup>Ting Xu, Qun Song, Kun Liu, and Huayu Liu contributed equally to this work.

\*Corresponding authors. E-mail: [kai.zhang@uni-goettingen.de](mailto:kai.zhang@uni-goettingen.de) (K. Zhang); [sichli@tust.edu.cn](mailto:sichli@tust.edu.cn) (C. Si); [hzd0024@auburn.edu](mailto:hzd0024@auburn.edu) (H. Du)

### Supplementary Figures

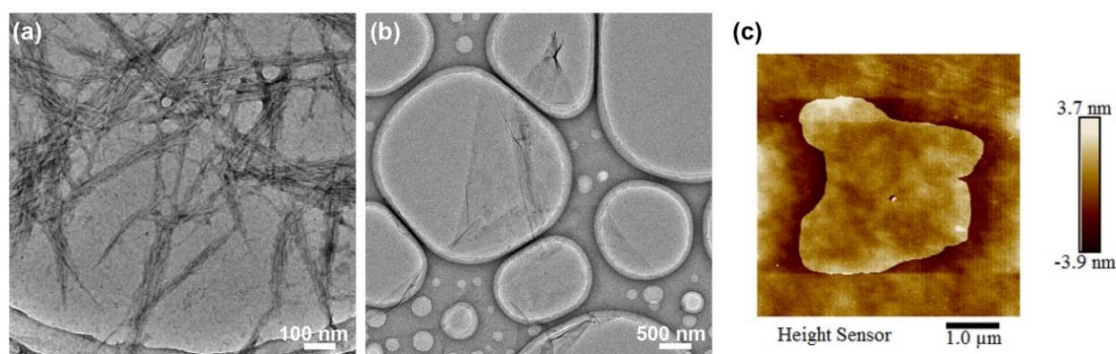

**Fig. S1** The TEM images of (a) CNF and (b) MXene, and (c) AFM image of MXene S1/S16

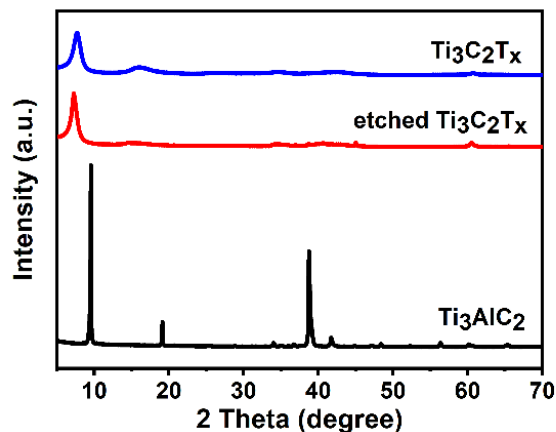

Fig. S2 XRD patterns of raw material ( $Ti_3AlC_2$ ), etched  $Ti_3C_2T_x$ , and  $Ti_3C_2T_x$

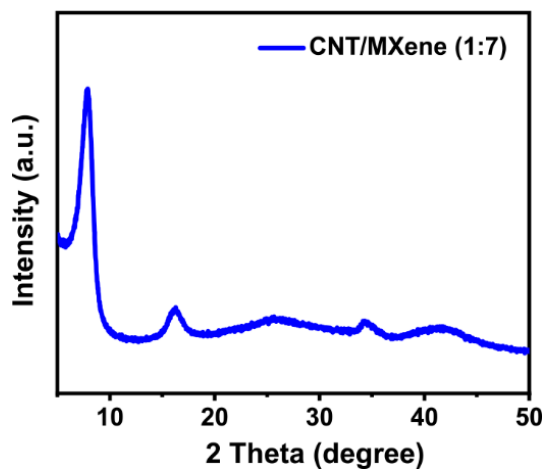

Fig. S3 XRD pattern of CNT/MXene (1:7) aerogel

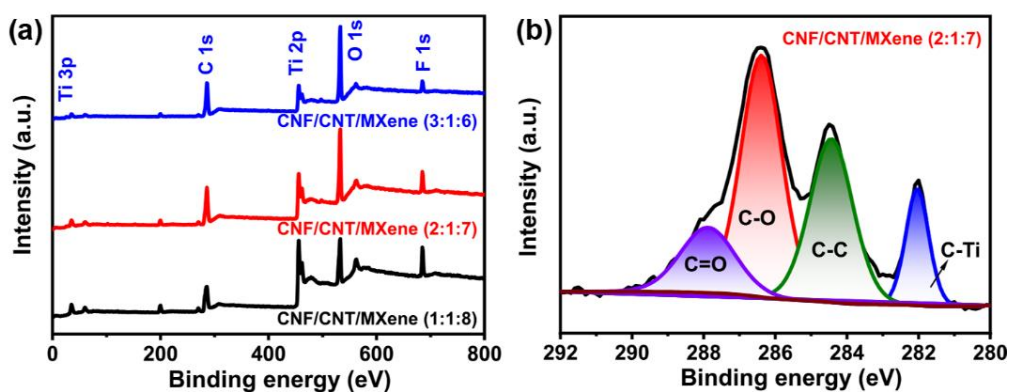

Fig. S4 XPS spectrum of (a) CNF/CNT/MXene (3:1:6), CNF/CNT/MXene (2:1:7), and CNF/CNT/MXene (1:1:8) aerogels. (b) XPS high-resolution C 1s spectra of CNF/CNT/MXene (2:1:7) aerogel

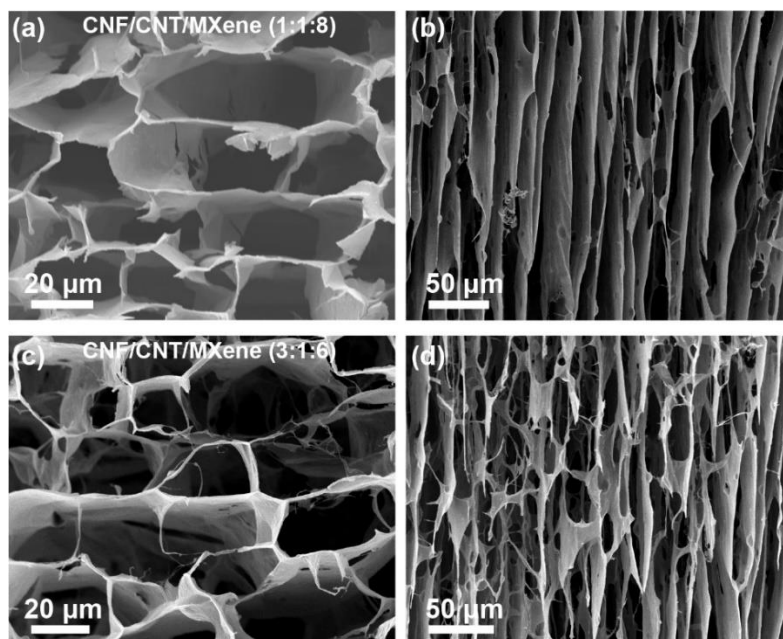

**Fig. S5** (a) The top-view and (b) side-view SEM images of CNF/CNT/MXene (1:1:8) aerogel. (c) The top-view and (d) side-view SEM images of CNF/CNT/MXene (3:1:6) aerogel

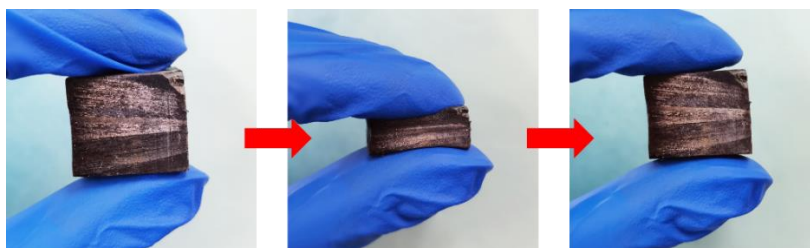

**Fig. S6** The optical image of compression and recovery process of the CNF/CNT/MXene (2:1:7) aerogel

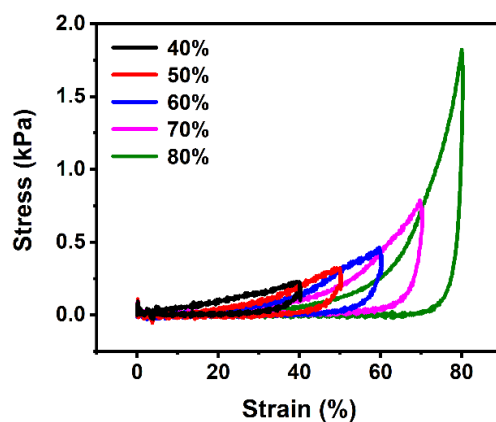

**Fig. S7** Stress-strain curves of CNT/MXene (1:7) aerogel at different compression strains

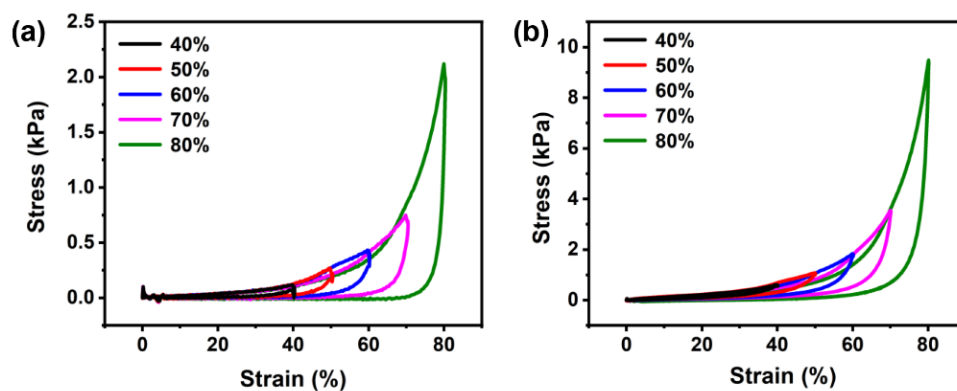

**Fig. S8** Stress-strain curves of (a) CNF/CNT/MXene (1:1:8) aerogel and (b) CNF/CNT/MXene (3:1:6) aerogel at different compression strains

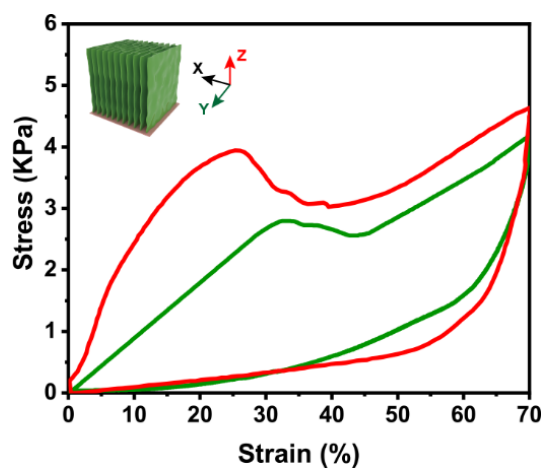

**Fig. S9** Stress-strain curves of CNF/CNT/MXene (2:1:7) aerogel in Y-direction and Z-direction

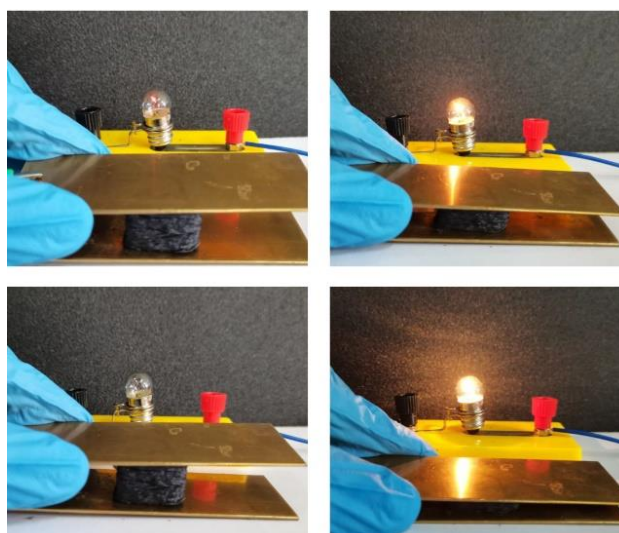

**Fig. S10** The changes of bulb brightness under different strains in a closed circuit

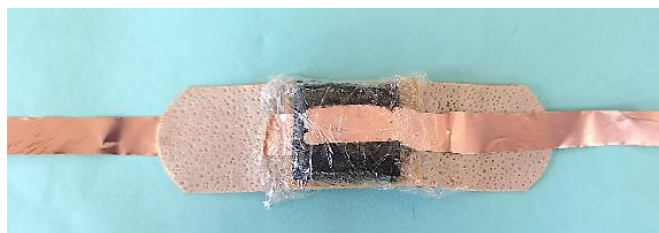

Fig. S11 Digital photo of the assembled sensor

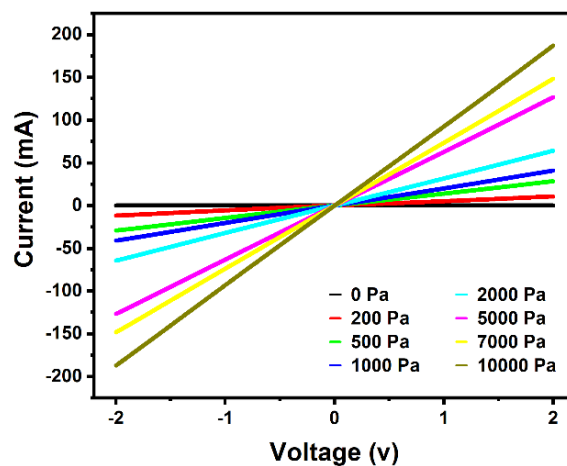

Fig. S12 Current response at different pressures with a voltage ranging from -2 to 2 V

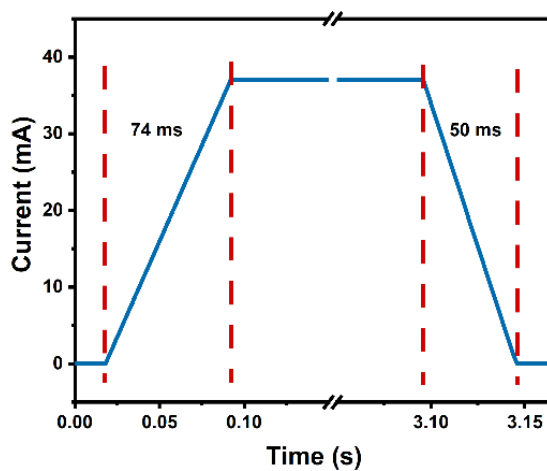

Fig. S13 Response and recovery times of the sensor

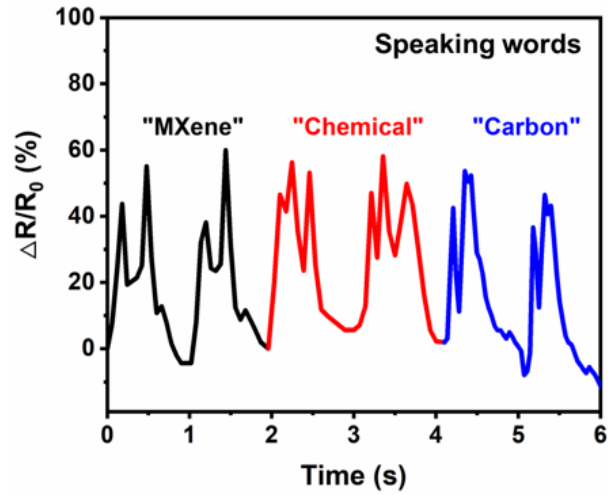

Fig. S14 Current signals from speaking different words

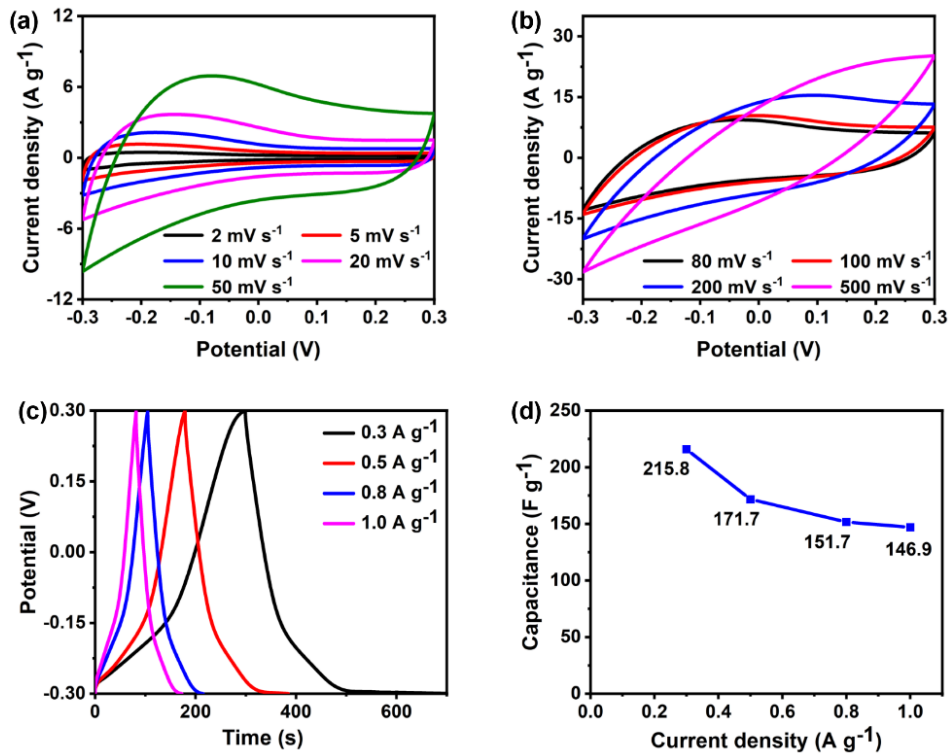

Fig. S15 (a, b) CV curves at different scan rates and (c) GCD profiles at different current densities of CNF/CNT/MXene (2:1:7) aerogel electrode. (d) Specific capacitance of CNF/CNT/MXene (2:1:7) aerogel electrode based on the GCD profiles

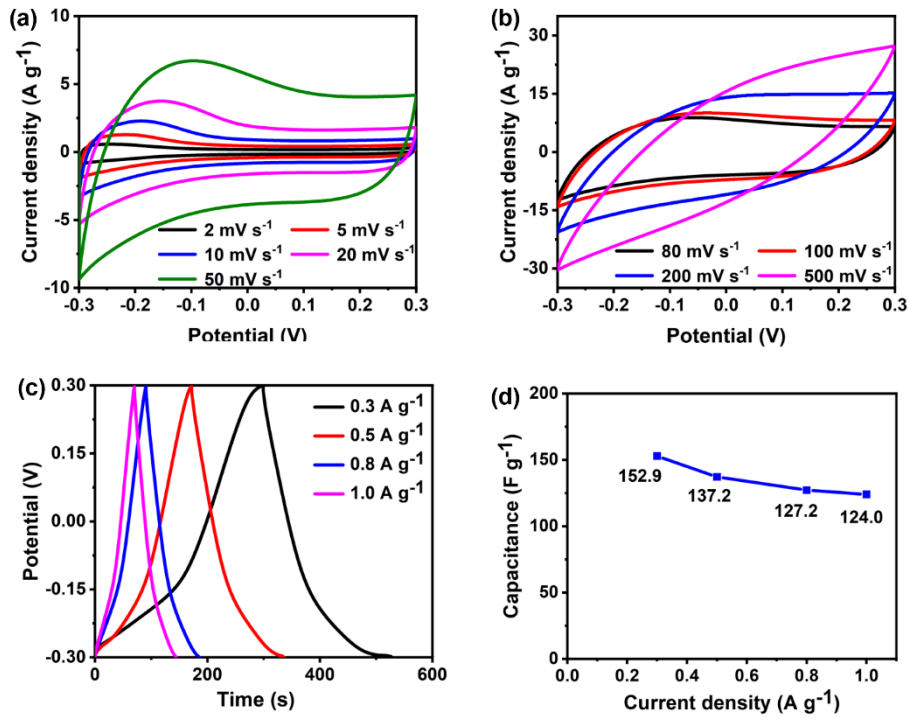

**Fig. S16** (a, b) CV curves at different scan rates and (c) GCD profiles at different current densities of CNF/CNT/MXene (1:1:8) aerogel electrode. (d) Specific capacitance of CNF/CNT/MXene (1:1:8) aerogel electrode based on the GCD profile

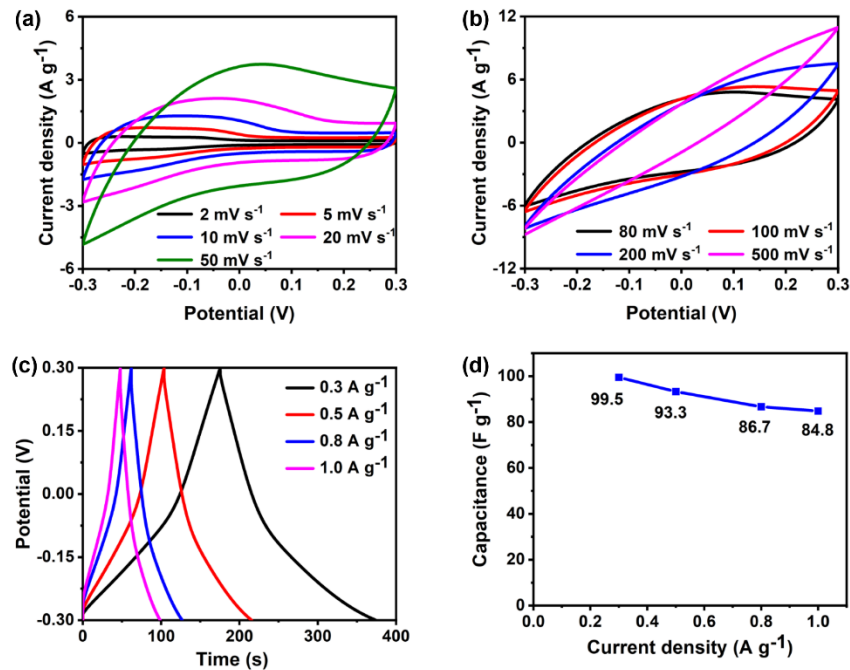

**Fig. S17** (a, b) CV curves at different scan rates and (c) GCD profiles at different current densities of CNF/CNT/MXene (3:1:6) aerogel electrode. (d) Specific capacitance of CNF/CNT/MXene (3:1:6) aerogel electrode based on the GCD profiles

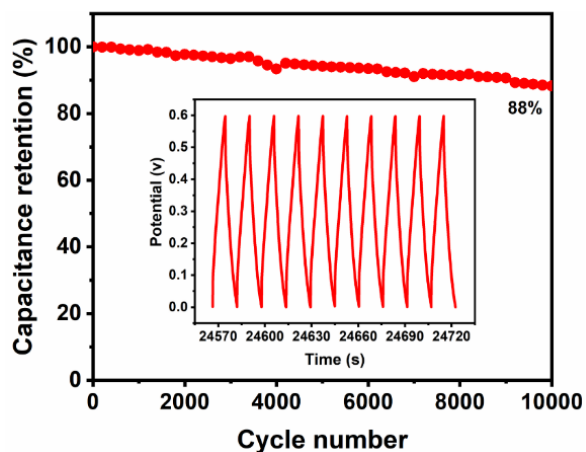

**Fig. S18** Cycling stability of compressible supercapacitors over 10000 cycles at 10 mA cm<sup>-2</sup>

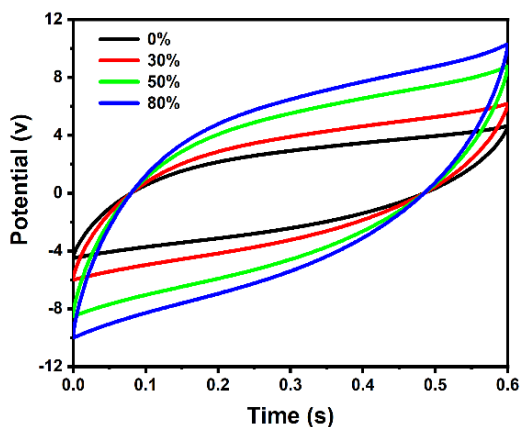

**Fig. S19** CV curves of compressible supercapacitor under various strains from 0% to 80%

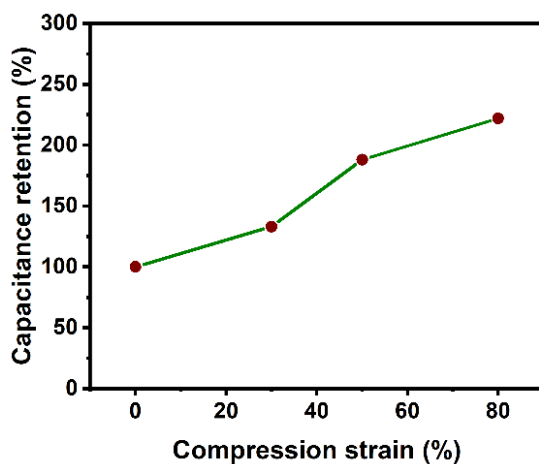

**Fig. S20** The capacitance retention under various strains from 0% to 80%



**Table S1** The prepared CNF/CNT/MXene aerogels with different mass ratio

| CNF/CNT/MXene aerogels | CNF | CNT | MXene |
|------------------------|-----|-----|-------|
| CNF/CNT/MXene (3:1:6)  | 3   | 1   | 6     |
| CNF/CNT/MXene (2:1:7)  | 2   | 1   | 7     |
| CNF/CNT/MXene (1:1:8)  | 1   | 1   | 8     |
| CNT/MXene (1:7)        | 0   | 1   | 7     |

**Table S2** The density and conductivity of different CNF/CNT/MXene aerogels

| Sample of aerogels    | Density (g cm <sup>-3</sup> ) | Conductivity (S m <sup>-1</sup> ) |
|-----------------------|-------------------------------|-----------------------------------|
| CNF/CNT/MXene (1:1:8) | 8.0                           | 1650                              |
| CNF/CNT/MXene (2:1:7) | 7.5                           | 2400                              |
| CNF/CNT/MXene (3:1:6) | 7.8                           | 820                               |

**Table S3** Comparison of sensor performance of CNF/CNT/MXene aerogel with those compressible MXene-based aerogels and carbon aerogels

| Materials                                     | Sensitivity (kPa <sup>-1</sup> ) | Pressure range (kPa) | Response/recovery time (ms) | Long-term stability | Refs.           |
|-----------------------------------------------|----------------------------------|----------------------|-----------------------------|---------------------|-----------------|
| MXene/silver nanowires aerogel                | 645.69                           | 0-1                  | 60/144                      | 2000                | S1              |
| CNFs/Lignin carbon aerogels                   | 5.16                             | 0-16.89              | 65/52                       | 1000                | S2              |
| Aramid Nanofibers/MXene Aerogel               | 128                              | 0-5                  | 320/98                      | -                   | S3              |
| MXene/CNF foam                                | 419.7                            | 0-8.04               | 123/139                     | 10000               | S4              |
| MXene/Polyaniline/Bacterial cellulose aerogel | 327.22                           | 0-3                  | -                           | -                   | S5              |
| CNF/CNT/RGO carbon aerogels                   | 5.61                             | 0-0.21               | -                           | 2000                | S6              |
| CNF/CNT/MXene aerogel                         | 817.3/234.9                      | 0-0.2/0.2-1.5        | 74/50                       | 2000                | <b>Our work</b> |

## Supplementary References

- [S1] L. Bi, Z. Yang, L. Chen, Z. Wu, C. Ye, Compressible AgNWs/Ti<sub>3</sub>C<sub>2</sub>T<sub>x</sub> MXene aerogel-based highly sensitive piezoresistive pressure sensor as versatile electronic skins. *J. Mater. Chem. A* **8**, 20030-20036 (2020). <https://doi.org/10.1039/D0TA07044K>
- [S2] Z. Chen, H. Zhuo, Y. Hu, H. Lai, L. Liu et al., Wood-derived lightweight and elastic carbon aerogel for pressure sensing and energy storage. *Adv. Funct. Mater.* **30**, 1910292 (2020). <https://doi.org/10.1002/adfm.201910292>

- [S3] L. Wang, M. Zhang, B. Yang, J. Tan, X. Ding, Highly compressible, thermally stable, light-weight, and robust aramid nanofibers/Ti<sub>3</sub>AlC<sub>2</sub> MXene composite aerogel for sensitive pressure sensor. ACS Nano **14**, 10633-10647 (2020). <https://doi.org/10.1021/acsnano.0c04888>
- [S4] T. Su , N. Liu, Y. Gao , D. Lei , L. Wang et al., MXene/cellulose nanofiber-foam based high performance degradable piezoresistive sensor with greatly expanded interlayer distances. Nano Energy **87**, 106151 (2021). <https://doi.org/10.1016/j.nanoen.2021.106151>
- [S5] H. Zhi, X. Zhang, F. Wang, P. Wan, L. Feng, Flexible Ti<sub>3</sub>C<sub>2</sub>T<sub>x</sub> MXene/PANI/Bacterial cellulose aerogel for e-skins and gas sensing. ACS Appl. Mater. Interfaces **13**, 45987-45994 (2021). <https://doi.org/10.1021/acsaami.1c12991>
- [S6] H. Liu, T. Xu, C. Cai, K. Liu, W. Liu et al., Multifunctional superelastic, superhydrophilic, and ultralight nanocellulose-based composite carbon aerogels for compressive supercapacitor and strain sensor. Adv. Funct. Mater. **32**, 2113082 (2022). <https://doi.org/10.1002/adfm.202113082>
